# Supplementary material for: Comprehensive Transcriptome and Metabolic Profiling of Petal Color Development in Lycoris sprengeri
Source: Front Plant Sci. 2021 Dec 3;12:747131. doi: 10.3389/fpls.2021.747131 (PMC8678534; doi:10.3389/fpls.2021.747131)
Supplement: Supplementary Table 13 — pH measurements in white and pink petals. [file Table_13.xlsx]

## Sheet: Sheet1
Flower color	Plant species	pH value
White petals	Lycoris sprengeri	5.65 ± 0.04a
Pink petals	Lycoris sprengeri	5.25 ± 0.02b
